# Supplementary figures and images for: Light-activated nanocomposite thin sheet for high throughput contactless biomolecular delivery into hard-to-transfect cells
Source: Royal Society of Chemistry journal article supplement (doi:10.1039/d4an01331j), 2024-12-18

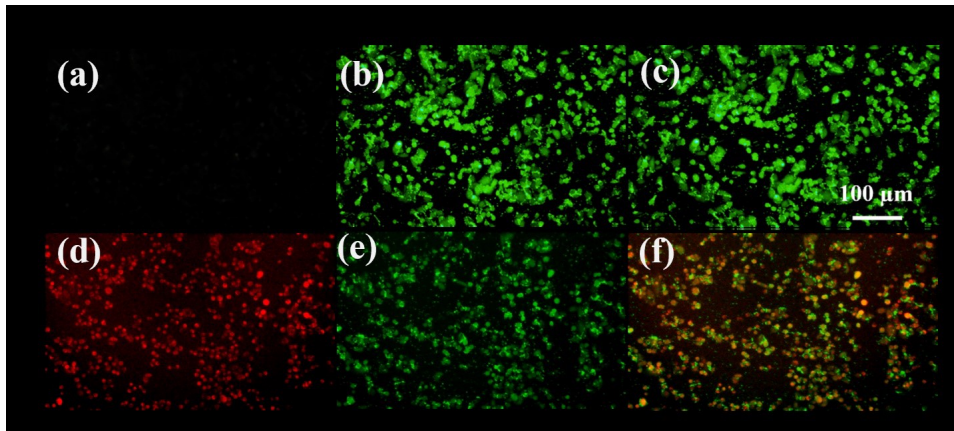

Supplement: d4an01331j10.pdf [file d4an01331j10.pdf]

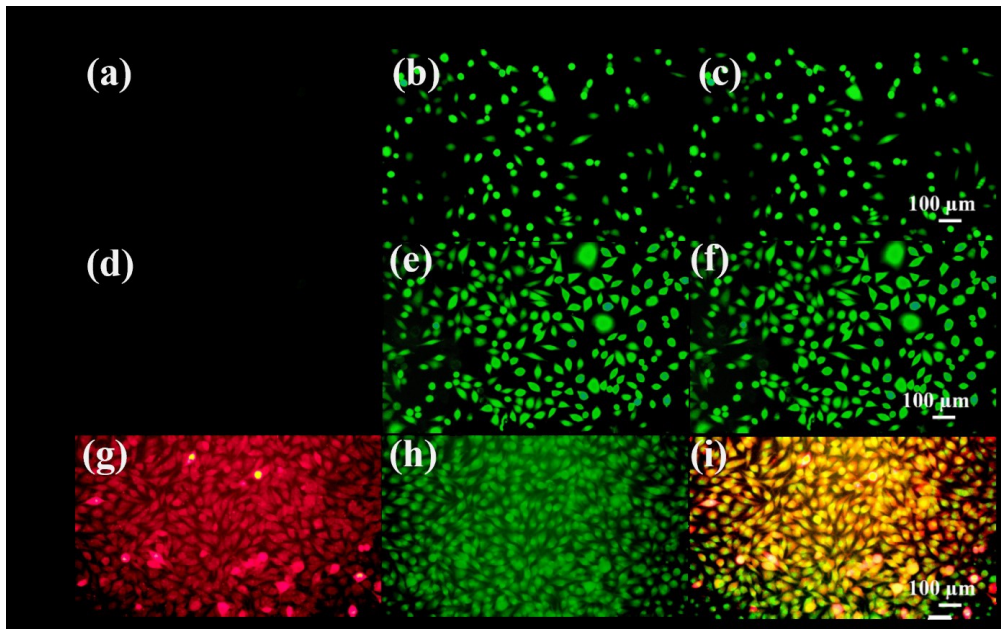

Supplement: d4an01331j11.pdf [file d4an01331j11.pdf]

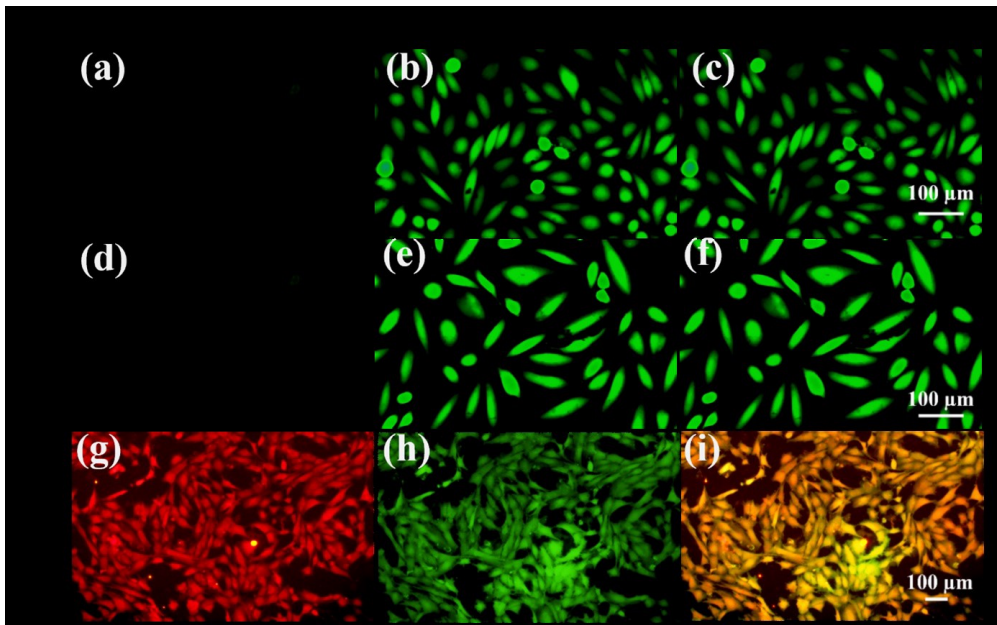

Supplement: d4an01331j12.pdf [file d4an01331j12.pdf]

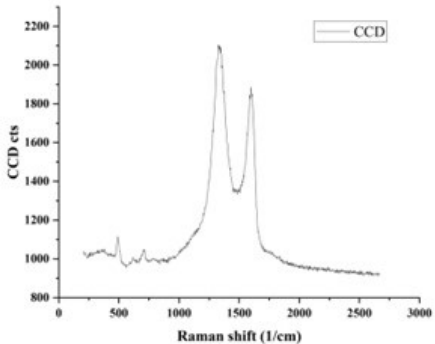

Supplement: d4an01331j13.pdf [file d4an01331j13.pdf]

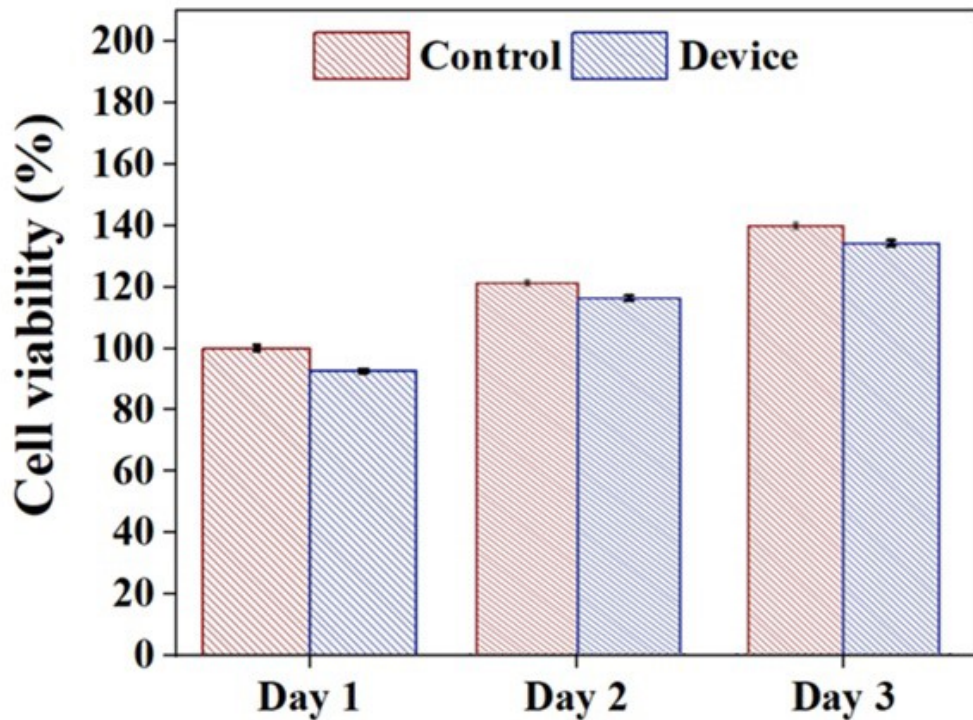

Supplement: d4an01331j14.pdf [file d4an01331j14.pdf]

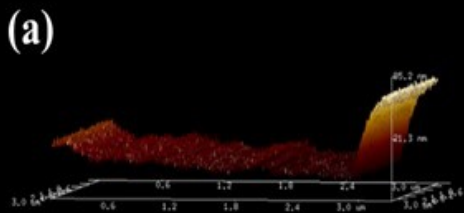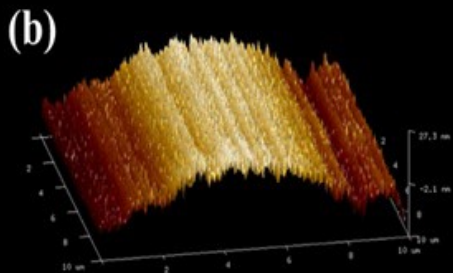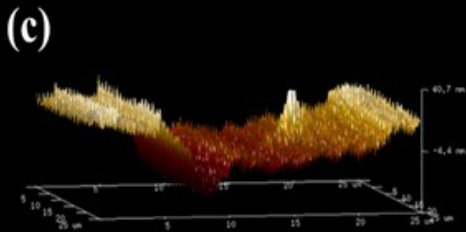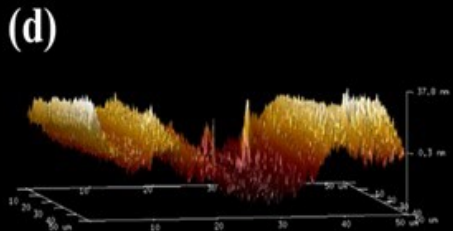

Supplement: d4an01331j15.pdf [file d4an01331j15.pdf]

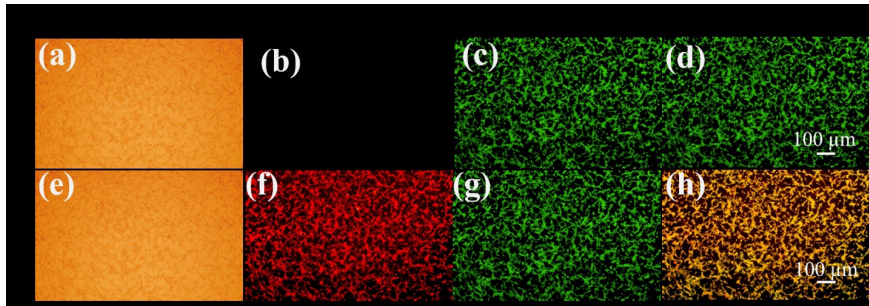

Supplement: d4an01331j16.pdf [file d4an01331j16.pdf]

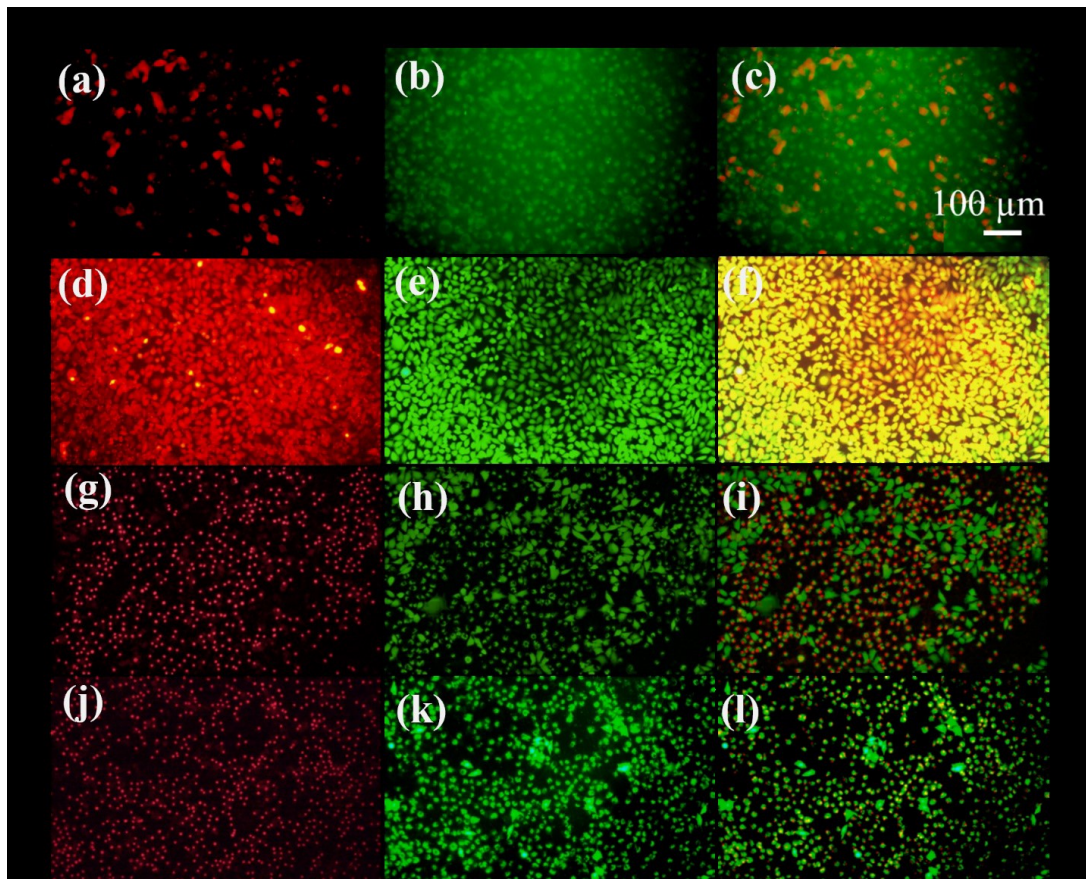

Supplement: d4an01331j17.pdf [file d4an01331j17.pdf]

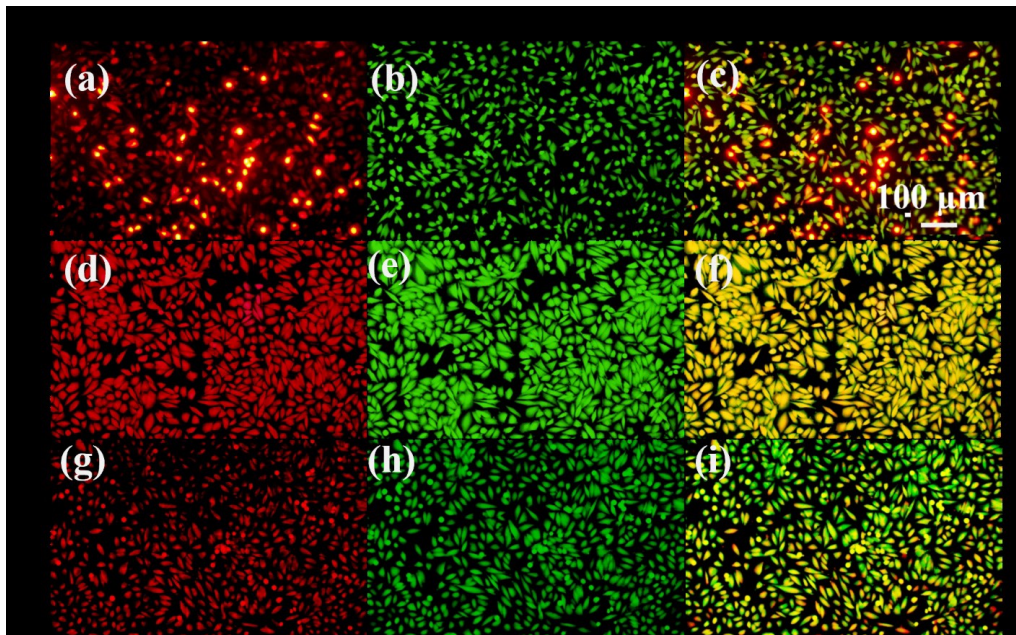

Supplement: d4an01331j18.pdf [file d4an01331j18.pdf]

Supplementary Information (SI) for Analyst.  
This journal is © The Royal Society of Chemistry 2024

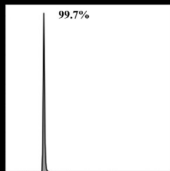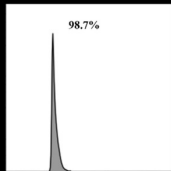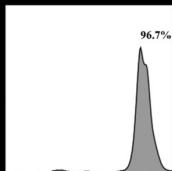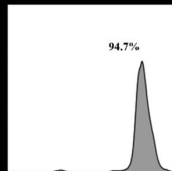

Supplement: d4an01331j19.pdf [file d4an01331j19.pdf]

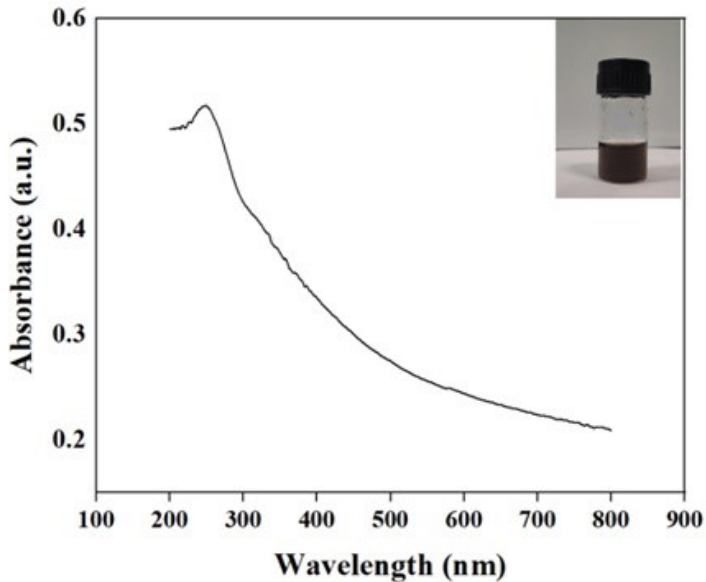

Supplement: d4an01331j2.pdf [file d4an01331j2.pdf]

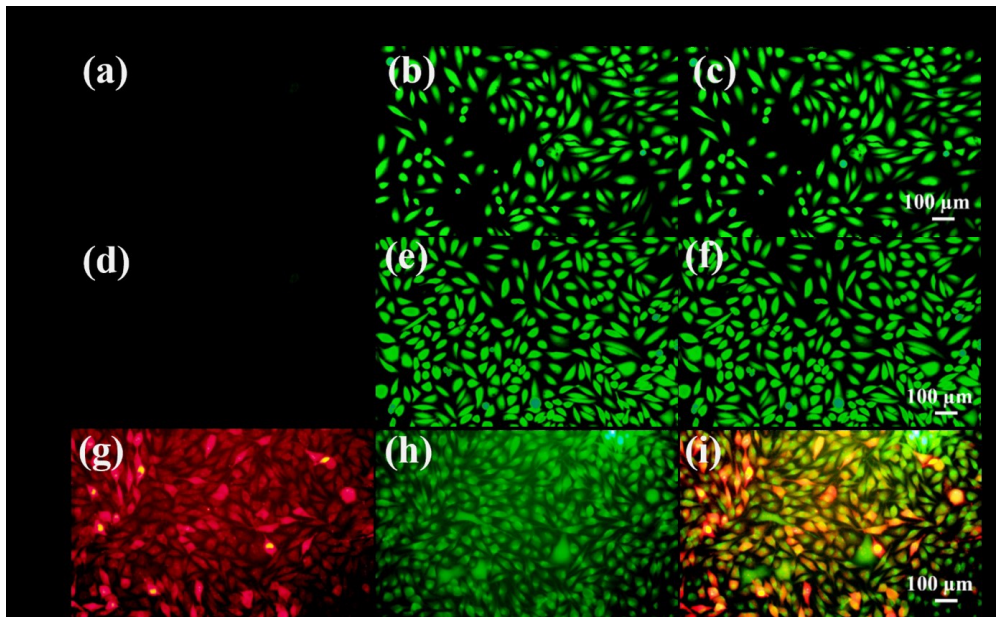

Supplement: d4an01331j20.pdf [file d4an01331j20.pdf]

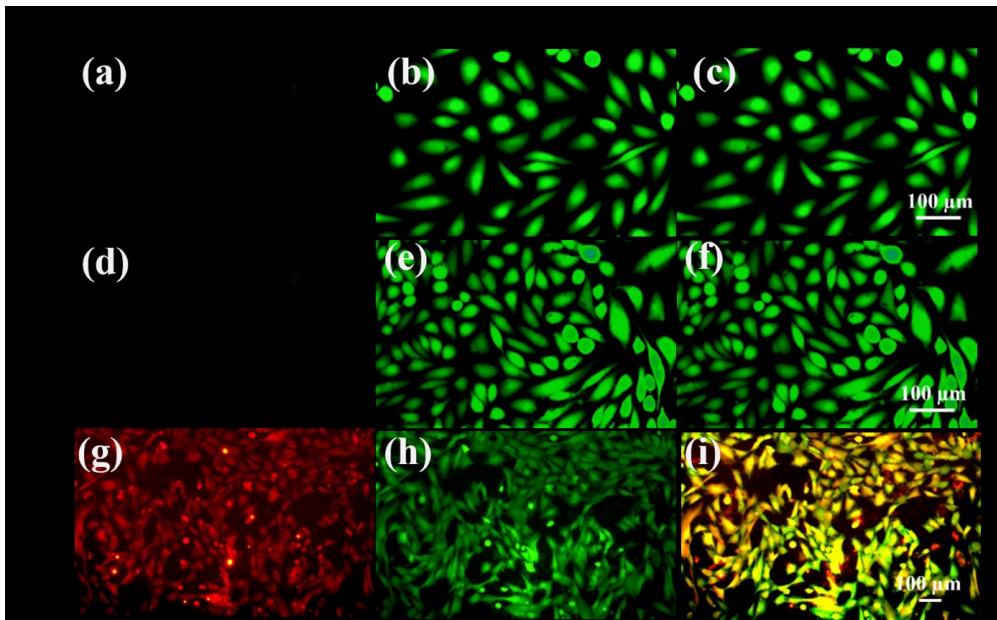

Supplement: d4an01331j21.pdf [file d4an01331j21.pdf]

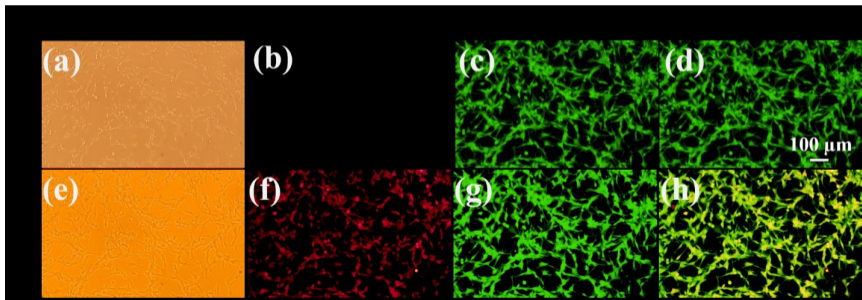

Supplement: d4an01331j3.pdf [file d4an01331j3.pdf]

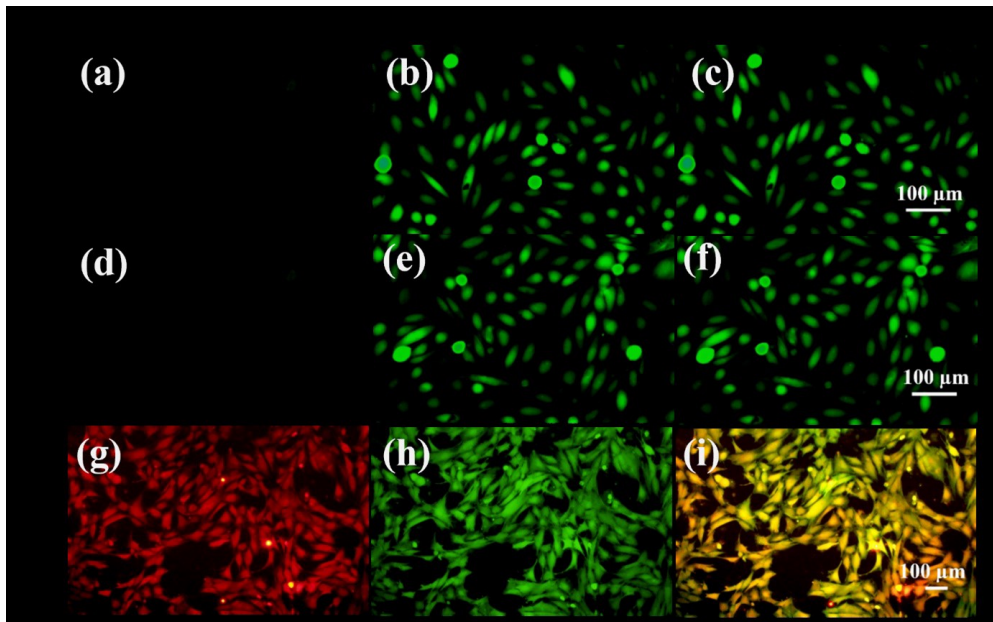

Supplement: d4an01331j4.pdf [file d4an01331j4.pdf]

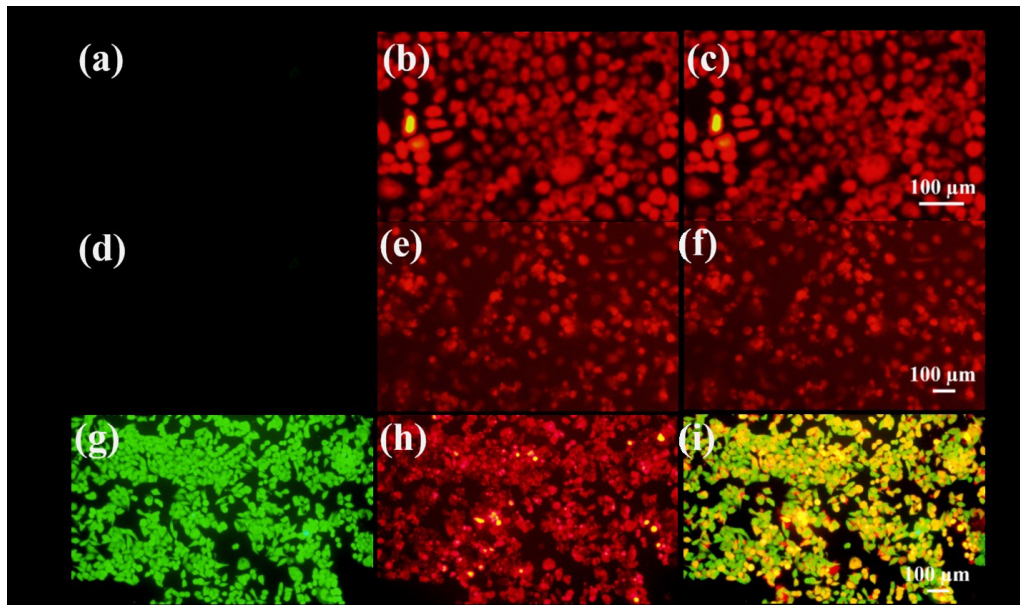

Supplement: d4an01331j5.pdf [file d4an01331j5.pdf]

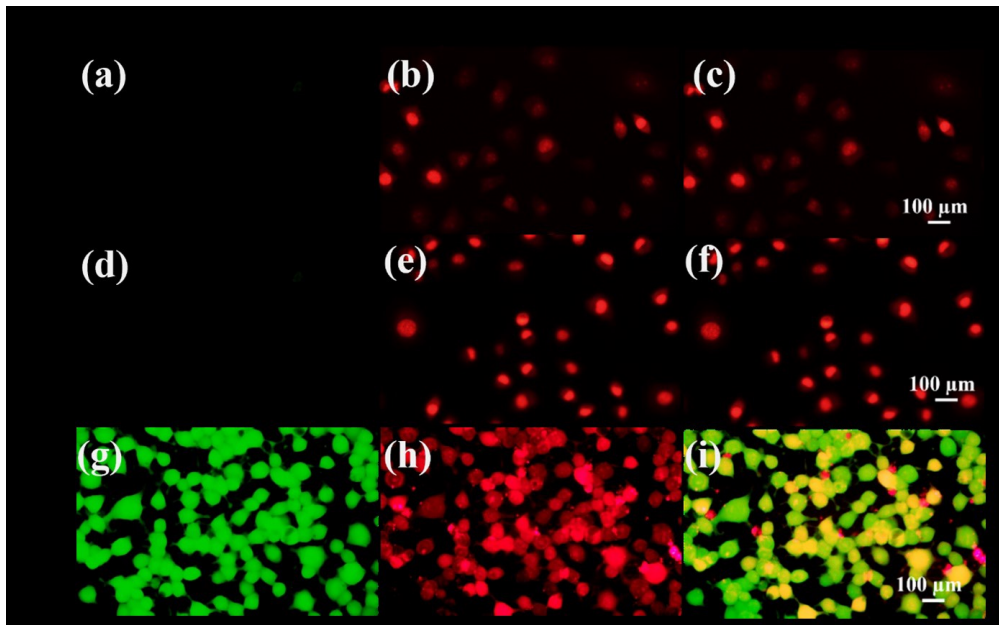

Supplement: d4an01331j6.pdf [file d4an01331j6.pdf]

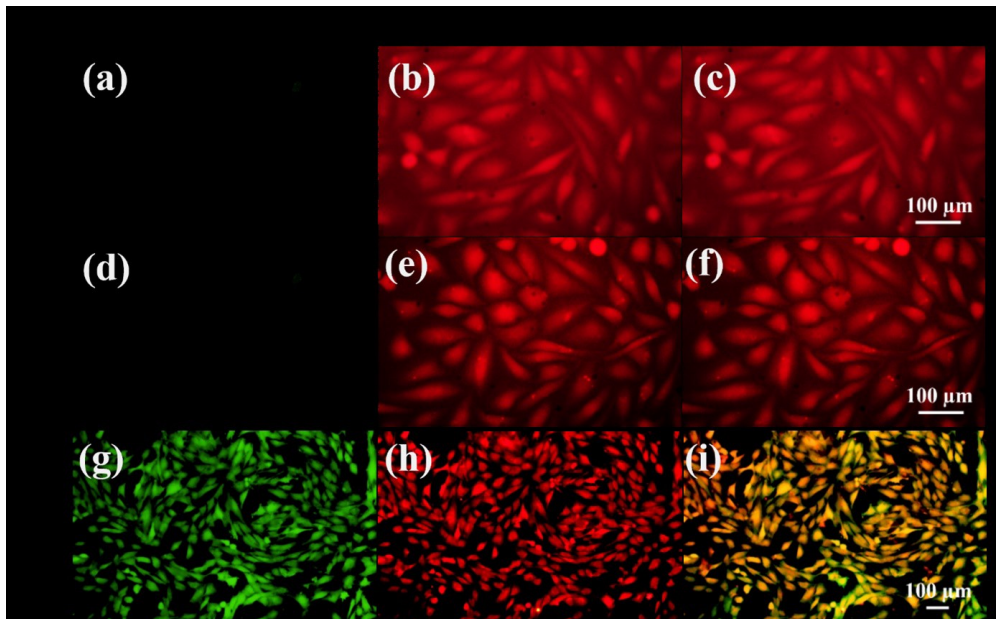

Supplement: d4an01331j7.pdf [file d4an01331j7.pdf]

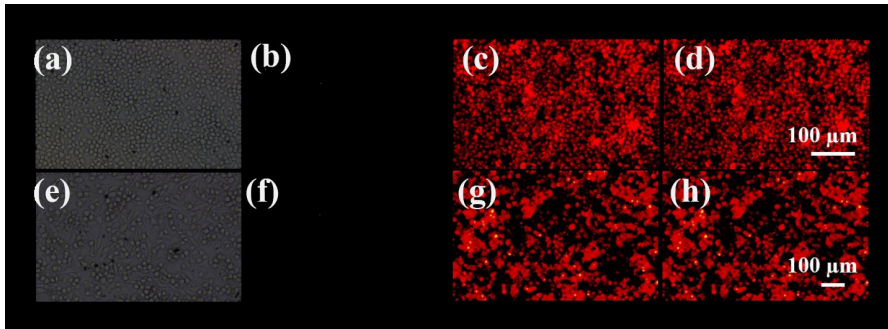

Supplement: d4an01331j8.pdf [file d4an01331j8.pdf]

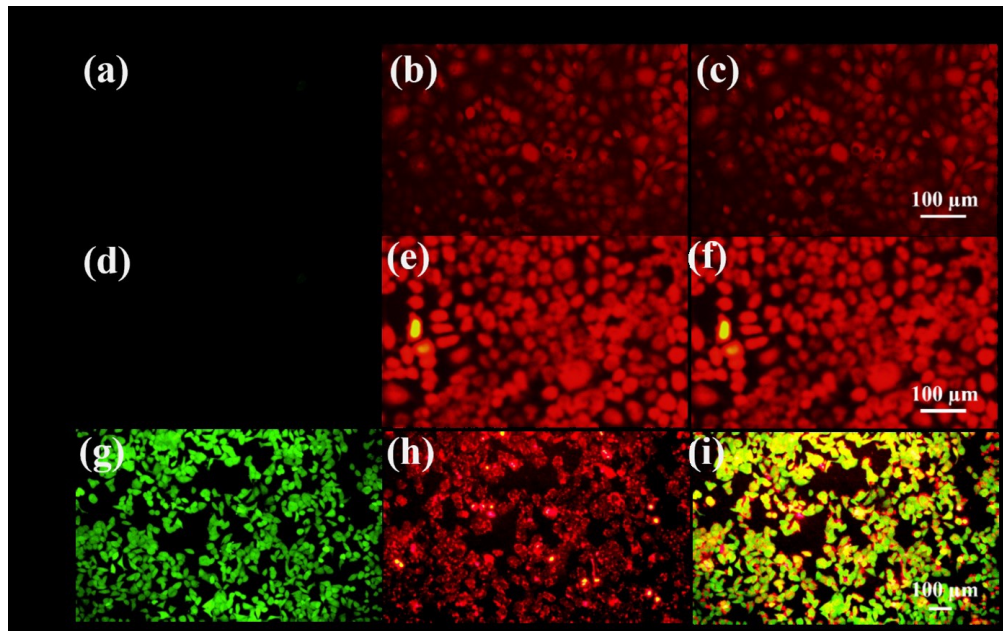

Supplement: d4an01331j9.pdf [file d4an01331j9.pdf]
